# Supplementary material for: A Quantitative System for Discriminating Induced Pluripotent Stem Cells, Embryonic Stem Cells and Somatic Cells
Source: PLoS One. 2013 Feb 13;8(2):e56095. doi: 10.1371/journal.pone.0056095 (PMC3572019; doi:10.1371/journal.pone.0056095)
Supplement: Table S5 — Biomarkers for female and male iPSCs. Please refer to Table S2. (XLSX) [file pone.0056095.s005.xlsx]

## Sheet: Table S5.biomarkers.for female 
Table S5 Biomarkers for female versus male iPSCs
ID	Chr	MapInfo	Symbol	rank
cg26955512	X	71709270	HDAC8	0.963886
cg26606552	X	48979381	CCDC22	0.963164
cg24779040	X	53128332	TSPYL2	0.959046
cg21860846	X	47395451	ELK1	0.958919
cg20825323	X	69269772	IGBP1	0.956802
cg21693321	X	70255056	MED12	0.956773
cg20085077	X	100627077	ARMCX4	0.956672
cg23050981	X	152794653	L1CAM	0.956455
cg04037732	X	70281500	NLGN3	0.956331
cg03936963	X	53003738	TMEM29	0.955745
cg14132995	X	48654314	SLC35A2	0.955726
cg15480941	X	48661069	PIM2	0.955357
cg11291009	X	62891792	ARHGEF9	0.955201
cg19407266	X	63341847	FLJ39827	0.954626
cg12653105	X	48915243	PLP2	0.954275
cg26624294	X	151749895	CETN2	0.95416
cg25410279	X	153360711	DXS9879E	0.954035
cg11806565	X	71851420	PHKA1	0.953301
cg25813820	X	153686792	MPP1	0.952877
cg07876586	X	118254384	PGRMC1	0.952638
cg12219915	X	153325488	FAM50A	0.952024
cg11653864	X	47394828	ELK1	0.951875
cg12687215	X	153326092	FAM50A	0.951282
cg18507125	X	100532762	RPL36A	0.951106
cg19572242	X	152938984	IRAK1	0.951079
cg18503052	X	48914983	PLP2	0.95101
cg25226891	X	70390897	ZMYM3	0.950868
cg02205962	X	152643001	BCAP31	0.950678
cg14854487	X	119487126	LAMP2	0.950645
cg18233735	X	152748915	PDZD4	0.95061
cg05906362	X	152845948	ARHGAP4	0.949989
cg11371160	X	153367809	UBL4A	0.949302
cg04344997	X	153260323	EMD	0.949271
cg07374632	X	48578609	PCSK1N	0.94913
cg27271368	X	66681136	AR	0.949099
cg11714014	X	151557853	GABRQ	0.948677
cg08785133	X	48252137	PORCN	0.948413
cg13839778	X	47363992	SYN1	0.948411
cg24341236	X	153953047	MTCP1	0.948295
cg12536534	X	153428057	G6PD	0.948111
cg09923855	X	135407132	HTATSF1	0.947836
cg00618396	X	154097745	VBP1	0.947594
cg00145348	X	55043587	APEX2	0.947365
cg02004156	X	48787713	TFE3	0.947151
cg18780751	X	153429195	G6PD	0.947121
cg01140782	X	152517607	FAM58A	0.946723
cg17206029	X	69426419	KIF4A	0.94639
cg26738912	X	51828986	MAGED4	0.946229
cg23936476	X	102205776	BEX1	0.946156
cg05019001	X	66683059	AR	0.945836
cg19421044	X	153293500	DNASE1L1	0.94582
cg11648471	X	14800922	MOSPD2	0.94566
cg26246138	X	18282533	SCML2	0.945574
cg07428182	X	153340120	PLXNA3	0.945572
cg20641280	X	153360987	DXS9879E	0.945442
cg11233153	X	153371885	SLC10A3	0.945238
cg09229960	X	153261050	EMD	0.945064
cg22983460	X	48439846	SUV39H1	0.944885
cg06659128	X	154495729	TMLHE	0.944859
cg05786601	X	66680851	AR	0.9445
cg03595428	X	153952468	MTCP1	0.944195
cg03157806	X	148521080	FAM11A	0.943842
cg07780118	X	66683231	AR	0.943815
cg27271445	X	152713344	IDH3G	0.943146
cg10401803	X	70502904	TAF1	0.94314
cg21142188	X	77052950	ATP7A	0.943115
cg15014034	X	43400488	MAOA	0.942953
cg10455133	X	47305452	ARAF	0.942578
cg01086868	X	66681256	AR	0.942512
cg03992069	X	70391508	ZMYM3	0.942483
cg19441691	X	43400293	MAOA	0.942326
cg14368286	X	48818897	PRAF2	0.942231
cg16510010	X	133768829	RP3-473B4.1	0.941643
cg19949137	X	135407646	HTATSF1	0.941408
cg01887353	X	47227424	ZNF41	0.941399
cg24415468	X	84385735	ZNF6	0.940292
cg23698956	X	153398109	FAM3A	0.940016
cg06942445	X	54964098	TRO	0.939899
cg05592527	X	100759644	ARMCX6	0.939795
cg12589433	X	66682703	AR	0.939416
cg01910452	X	152642618	BCAP31	0.939235
cg07137581	X	63342501	FLJ39827	0.939022
cg19062189	X	101658281	TMSL8	0.938766
cg21509846	X	102206024	BEX1	0.93868
cg20504202	X	54483777	RP1-112K5.2	0.938589
cg12707233	X	54401689	WNK3	0.938521
cg08496601	X	48265364	EBP	0.937956
cg16204757	X	64804464	MSN	0.937829
cg12064213	X	9942520	WWC3	0.937712
cg00128197	X	53478180	HADH2	0.937436
cg06489418	X	48219666	FTSJ1	0.937295
cg21966410	X	66682607	AR	0.937107
cg10530733	X	53095356	GPR173	0.936772
cg04702045	X	67570323	OPHN1	0.936766
cg26116400	X	153908141	FUNDC2	0.936747
cg06900776	X	100764763	ARMCX3	0.936692
cg06791102	X	152844794	ARHGAP4	0.936516
cg25714610	X	153397410	FAM3A	0.936401
cg27465531	X	21767633	MBTPS2	0.936206
cg14520448	X	48640150	PQBP1	0.936192
cg05961595	X	55043210	APEX2	0.935702
cg18307604	X	119487249	LAMP2	0.935674
cg14541939	X	118889941	NDUFA1	0.935538
cg07242375	X	48929500	LMO6	0.935501
cg04241572	X	53477938	HADH2	0.935366
cg23947872	X	149613021	MTMR1	0.935363
cg25270201	X	9944045	WWC3	0.935242
cg12204574	X	150893428	GABRE	0.934991
cg00690049	X	54850969	MAGED2	0.934875
cg18289259	X	100490721	TIMM8A	0.934454
cg18780401	X	48700069	OTUD5	0.934426
cg14105781	X	9393597	TBL1X	0.934416
cg25424556	X	55532208	USP51	0.934213
cg09920632	X	54087466	PHF8	0.934137
cg11272332	X	74659535	ZDHHC15	0.934091
cg14321399	X	55760916	RRAGB	0.933998
cg15636587	X	30581681	GK	0.933614
cg20832009	X	67784443	STARD8	0.933307
cg04944936	X	54226319	CXorf17	0.933162
cg23709838	X	48653827	SLC35A2	0.932683
cg02148711	X	76928215	ATRX	0.932575
cg14260918	X	46191477	ZNF673	0.932338
cg03164831	X	79952117	BRWD3	0.932055
cg21533271	X	153339383	PLXNA3	0.932046
cg26150490	X	47748539	LOC389852	0.931765
cg16429439	X	77037622	DKFZp564K142	0.931614
cg08076508	X	54086901	PHF8	0.931372
cg00230685	X	17665760	SCML1	0.93098
cg01241836	X	48788290	TFE3	0.929979
cg21030483	X	148521485	FAM11A	0.929584
cg20816612	X	71850354	PHKA1	0.929278
cg12431196	X	75564620	MAGEE1	0.929075
cg18731813	X	100692339	ARMCX1	0.928469
cg20878850	X	66680410	AR	0.928329
cg10818284	X	48943549	SYP	0.928278
cg23926715	X	64113003	KIAA1166	0.928265
cg14892037	X	70204751	SNX12	0.928148
cg17001703	X	64671588	LAS1L	0.927587
cg26035633	X	152712638	IDH3G	0.927556
cg18742441	X	153310416	ATP6AP1	0.927489
cg09928375	X	48699217	OTUD5	0.927241
cg16227775	X	74292976	ABCB7	0.927187
cg01257202	X	153645024	DKC1	0.927186
cg00029931	X	100532397	RPL36A	0.926586
cg16256230	X	69426796	KIF4A	0.926466
cg23066860	X	101854213	GPRASP2	0.926159
cg12900739	X	55760794	RRAGB	0.925998
cg27198071	X	133994276	CXX1	0.925979
cg08434396	X	146801470	FMR1	0.925899
cg00547789	X	154146944	RAB39B	0.925517
cg10801213	X	70067447	SLC7A3	0.925457
cg05511752	X	70255381	MED12	0.925408
cg21697779	X	153908728	FUNDC2	0.924247
cg22858728	X	153687343	MPP1	0.924056
cg11049305	X	64113476	KIAA1166	0.924014
cg18923230	X	153279607	RPL10	0.923763
cg26461352	X	100490217	TIMM8A	0.92337
cg23279136	X	74292691	ABCB7	0.922792
cg09406238	X	63532108	MTMR8	0.922495
cg10839723	X	9392900	TBL1X	0.922148
cg08300622	X	18282884	SCML2	0.921947
cg02298008	X	154147098	RAB39B	0.921742
cg09176853	X	70232770	MLLT7	0.921632
cg17552650	X	48844907	WDR45	0.921413
cg03672021	X	153255852	FLNA	0.921283
cg20540913	X	68752833	EDA	0.920541
cg05254049	X	47364606	SYN1	0.920139
cg12572939	X	153767650	F8A1	0.919924
cg17889912	X	53127895	TSPYL2	0.919849
cg19011603	X	74410791	RP11-311P8.3	0.919828
cg06277838	X	73558095	SLC16A2	0.918566
cg19392138	X	134306835	ZNF449	0.918368
cg20371650	X	48818332	PRAF2	0.918321
cg01975392	X	37316018	LANCL3	0.917628
cg11479591	X	153015370	MECP2	0.917574
cg26751631	X	73751020	RNF12	0.916425
cg25893483	X	153951795	CXorf53	0.916194
cg26267038	X	21302909	CNKSR2	0.915868
cg07311845	X	154495930	TMLHE	0.915736
cg20119635	X	37592018	DYNLT3	0.91572
cg17231524	X	134384171	MGC39606	0.914925
cg25053301	X	48341494	WDR13	0.914773
cg09347151	X	134383206	MGC39606	0.914573
cg00862041	X	101853673	GPRASP2	0.914364
cg19740287	X	14801684	MOSPD2	0.914149
cg01309671	X	133768891	RP3-473B4.1	0.913765
cg01353347	X	152938352	IRAK1	0.913743
cg09324116	X	13958202	FAM51A1	0.913075
cg00359973	X	53466625	RIBC1	0.913034
cg11854877	X	153767738	F8A1	0.912776
cg24522076	X	70232979	MLLT7	0.912241
cg11505080	X	53095229	GPR173	0.912022
cg16227684	X	153318056	GDI1	0.911891
cg14815778	X	152518489	FAM58A	0.911558
cg12689375	X	41077108	DDX3X	0.911387
